# Supplementary material for: Examination of Weight-Loss Motivators and Family Factors in Relation to Weight Management Strategies and Dietary Behaviors among Adolescents with Obesity
Source: MDPI journal article supplement (doi:10.3390/nu13051729), 2021-05-20
Supplement: s1 [file s1]

**Table S1.** Regression analyses assessing associations of family factors and weight loss motivators with unhealthy weight management strategies.

| Model/Parameter                         | B     | SE    | $\beta$ | R <sup>2</sup> | $\Delta R^2$ | $\Delta F$ Sig |
|-----------------------------------------|-------|-------|---------|----------------|--------------|----------------|
| <b>Model 1 – Covariates</b>             |       |       |         | .03            | .03          | .77            |
| Intercept                               | 0.41  | 0.53  |         |                |              |                |
| zBMI                                    | 0.03  | 0.12  | .04     |                |              |                |
| Age                                     | -0.01 | 0.03  | -.03    |                |              |                |
| Gender                                  | -0.06 | 0.048 | -.17    |                |              |                |
| Parent Education                        | -0.00 | 0.04  | -.01    |                |              |                |
| <b>Model 2 – Family Influences</b>      |       |       |         | .08            | .05          | .20            |
| Intercept                               | 0.38  | 0.55  |         |                |              |                |
| Healthy Eating Support                  | -0.05 | 0.05  | -.14    |                |              |                |
| Parental Dietary Restriction            | 0.07  | 0.05  | .18     |                |              |                |
| <b>Model 3 – Weight Loss Motivators</b> |       |       |         | .15            | .08          | .26            |
| Intercept                               | 0.32  | 0.55  |         |                |              |                |
| Health (autonomous)                     | -0.12 | 0.05  | -.31*   |                |              |                |
| Appearance (controlled)                 | 0.03  | 0.06  | .09     |                |              |                |
| Self-Esteem (controlled)                | 0.02  | 0.06  | .04     |                |              |                |
| Social (controlled)                     | -0.02 | 0.06  | -.06    |                |              |                |

zBMI: Body Mass Index z-score; <sup>a</sup> Model 2 included all variables from Model 1. <sup>b</sup> Model 3 included all variables from Models 1 and 2; <sup>†</sup> $p < .10$ ; \* $p < .05$ , \*\* $p < .01$ .

**Table S2.** Regression analyses assessing associations of family factors and weight loss motivators with salty snack consumption.

| Model/Parameter                         | B     | SE    | $\beta$           | R <sup>2</sup> | $\Delta R^2$ | $\Delta F$ Sig |
|-----------------------------------------|-------|-------|-------------------|----------------|--------------|----------------|
| <b>Model 1 – Covariates</b>             |       |       |                   | .04            | .04          | .67            |
| Intercept                               | 13.94 | 9.88  |                   |                |              |                |
| zBMI                                    | 0.68  | 2.26  | .04               |                |              |                |
| Age                                     | -0.32 | 0.56  | -.07              |                |              |                |
| Gender                                  | 1.18  | 0.89  | .17               |                |              |                |
| Parent Education                        | -.15  | 0.79  | -.02              |                |              |                |
| <b>Model 2 – Family Influences</b>      |       |       |                   | .08            | .05          | .20            |
| Intercept                               | 12.36 | 10.25 |                   |                |              |                |
| Healthy Eating Support                  | -0.92 | 0.83  | -.14              |                |              |                |
| Parental Dietary Restriction            | 1.28  | 0.91  | .18               |                |              |                |
| <b>Model 3 – Weight Loss Motivators</b> |       |       |                   | .20            | .12          | .09            |
| Intercept                               | 11.18 | 9.98  |                   |                |              |                |
| Health                                  | -1.86 | 0.94  | -.27 <sup>†</sup> |                |              |                |
| Appearance                              | 1.83  | 1.10  | .26               |                |              |                |
| Self-Esteem                             | -1.02 | 1.09  | -.15              |                |              |                |
| Social                                  | 0.28  | 1.01  | .04               |                |              |                |

zBMI: Body Mass Index z-score; <sup>a</sup> Model 2 included all variables from Model 1. <sup>b</sup> Model 3 included all variables from Models 1 and 2; <sup>†</sup> $p < .10$ ; \* $p < .05$ , \*\* $p < .01$ .

**Table S3.** Regression analyses assessing associations of family factors and weight loss motivators with fruit and vegetable consumption.

| <b>Model/Parameter</b>                  | <b>B</b> | <b>SE</b> | <b><math>\beta</math></b> | <b>R<sup>2</sup></b> | <b><math>\Delta R^2</math></b> | <b><math>\Delta F</math> Sig</b> |
|-----------------------------------------|----------|-----------|---------------------------|----------------------|--------------------------------|----------------------------------|
| <b>Model 1 – Covariates</b>             |          |           |                           | .04                  | .04                            | .57                              |
| Intercept                               | 4.49     | 15.43     |                           |                      |                                |                                  |
| zBMI                                    | 1.73     | 3.53      | .06                       |                      |                                |                                  |
| Age                                     | -.04     | 0.87      | -.01                      |                      |                                |                                  |
| Gender                                  | -1.95    | 1.39      | -.18                      |                      |                                |                                  |
| Parent Education                        | 1.43     | 1.24      | .14                       |                      |                                |                                  |
| <b>Model 2 – Family Influences</b>      |          |           |                           | .09                  | .05                            | .22                              |
| Intercept                               | 2.53     | 16.02     |                           |                      |                                |                                  |
| Healthy Eating Support                  | 1.94     | 1.30      | .19                       |                      |                                |                                  |
| Parental Dietary Restriction            | -1.32    | 1.42      | -.12                      |                      |                                |                                  |
| <b>Model 3 – Weight Loss Motivators</b> |          |           |                           | .16                  | .07                            | .28                              |
| Intercept                               | 0.85     | 16.01     |                           |                      |                                |                                  |
| Health                                  | -3.06    | 1.52      | -.28*                     |                      |                                |                                  |
| Appearance                              | -0.94    | 1.76      | -.09                      |                      |                                |                                  |
| Self-Esteem                             | 1.84     | 1.74      | .17                       |                      |                                |                                  |
| Social                                  | -1.80    | 1.61      | -.16                      |                      |                                |                                  |

zBMI: Body Mass Index z-score; <sup>a</sup> Model 2 included all variables from Model 1. <sup>b</sup> Model 3 included all variables from Models 1 and 2; <sup>†</sup> $p < .10$ ; \* $p < .05$ , \*\* $p < .01$ .
